# Supplementary material for: Climate and Processing Effects on Tea (Camellia sinensis L. Kuntze) Metabolome: Accurate Profiling and Fingerprinting by Comprehensive Two-Dimensional Gas Chromatography/Time-of-Flight Mass Spectrometry
Source: PubMed Central journal article supplement (PMC7288030; doi:10.3390/molecules25102447), 2020-05-24

Supplementary material

# Climate and Processing Effects on Tea (*Camellia sinensis* L. Kuntze) Metabolome: Accurate Profiling and Fingerprinting by Comprehensive Two-Dimensional Gas Chromatography/Time-of-Flight Mass Spectrometry

Federico Stilo <sup>1</sup>, Giulia Tredici <sup>1</sup>, Carlo Bicchi <sup>1</sup>, Albert Robbat Jr. <sup>2,\*</sup>, Joshua Morimoto <sup>2</sup> and Chiara Cordero <sup>1,\*</sup>

<sup>1</sup> Dipartimento di Scienza e Tecnologia del Farmaco, Università degli Studi di Torino, 10125 Turin, Italy; federico.stilo@unito.it (F.S.), giulia.tredici@edu.unito.it (G.T.); carlo.bicchi@unito.it (C.B.); chiara.cordero@unito.it

<sup>2</sup> Department of Chemistry, Tufts University, Medford, MA 02155, USA; albert.robbat@tufts.edu (A.R.J.); joshua.morimoto@tufts.edu

\* Correspondence: albert.robbat@tufts.edu (A.R.); chiara.cordero@unito.it (C.C.); Tel.: +1-617-627-3473 (A.R.); Tel.: +39-011 6702197 (C.C.)

The supplementary material comprises four Supplementary Figures:

**Figure S1:** 2D data elaboration work-flow adopted to comprehensively map tea primary metabolites signatures, by adopting a combined Untargeted and Targeted UT template matching approach.

**Figure S2:** schematic diagram of the extraction and derivatization procedure.

**Figure S3:** experimental results on targeted primary metabolites extraction yields.

**Figure S4:** method repeatability is indicated in terms of % relative standard deviation (%RSD) for both chromatographic dimensions (1tR and 2tR) and for % response, collected from UT peak-regions.

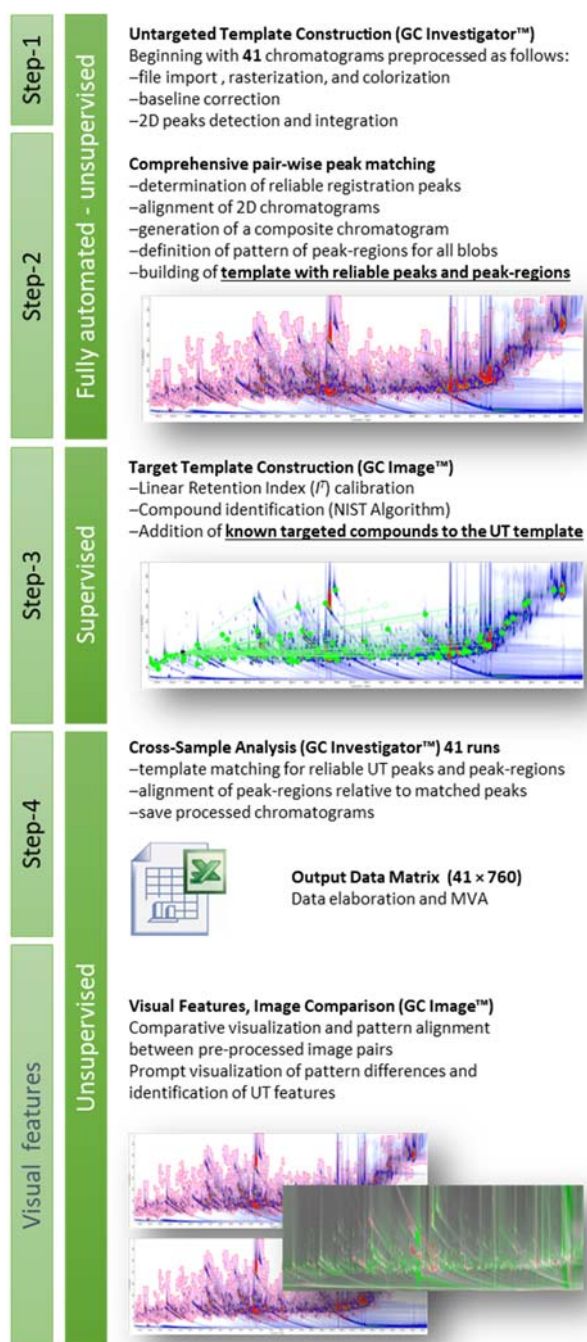

**Figure S1.** 2D data elaboration work-flow adopted to comprehensively map tea primary metabolites signatures, by adopting a combined Untargeted and Targeted UT template matching approach.

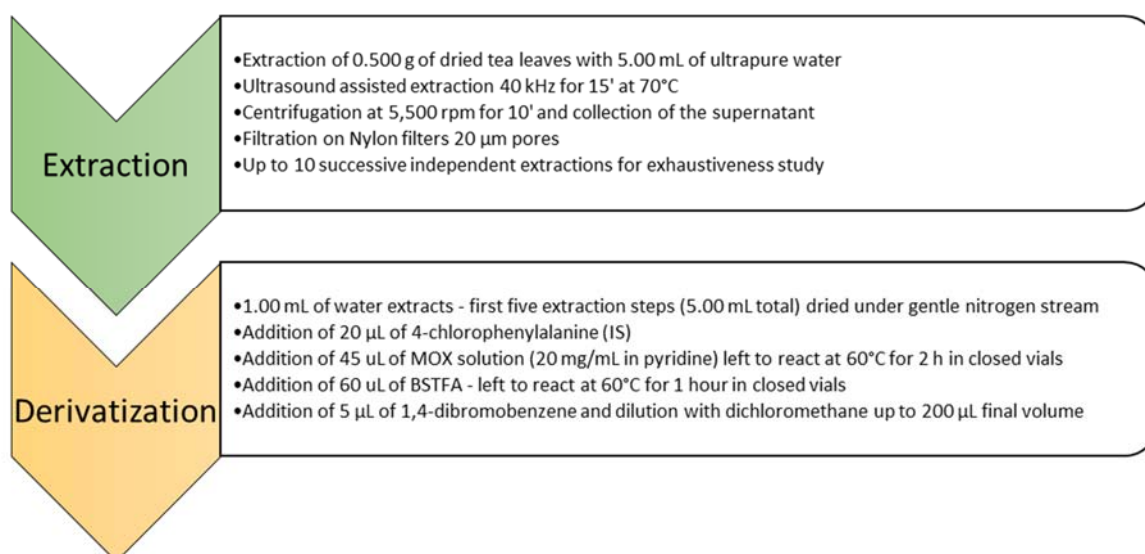

**Figure S2.** schematic diagram of the extraction and derivatization procedure.

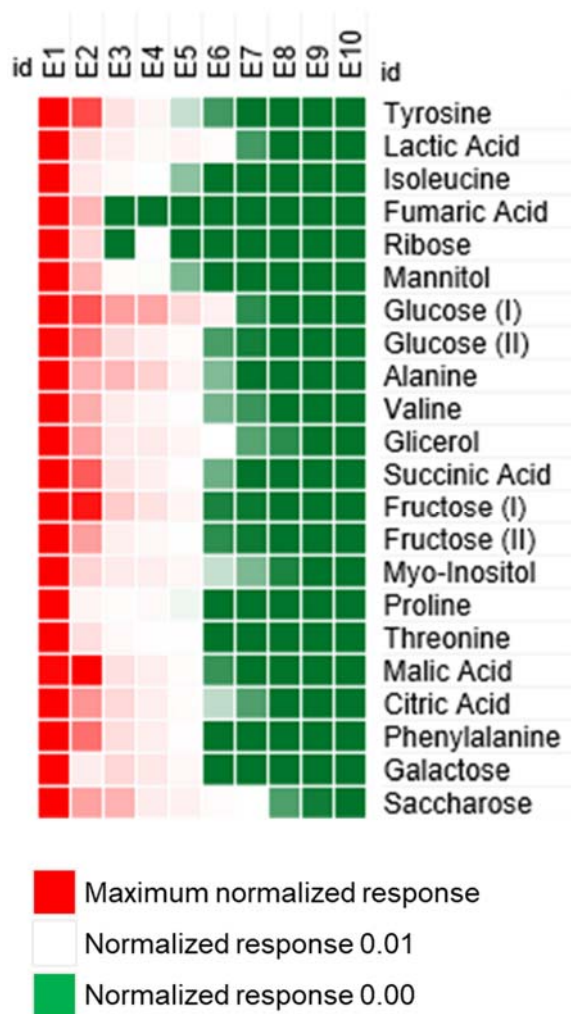

**Figure S3.** extraction yield results according to Figure S2 process; rows indicate relative metabolite concentration, while each column shows the relative amount by extraction step (from 1 to 10). All targeted compounds were extracted completely by step #9.

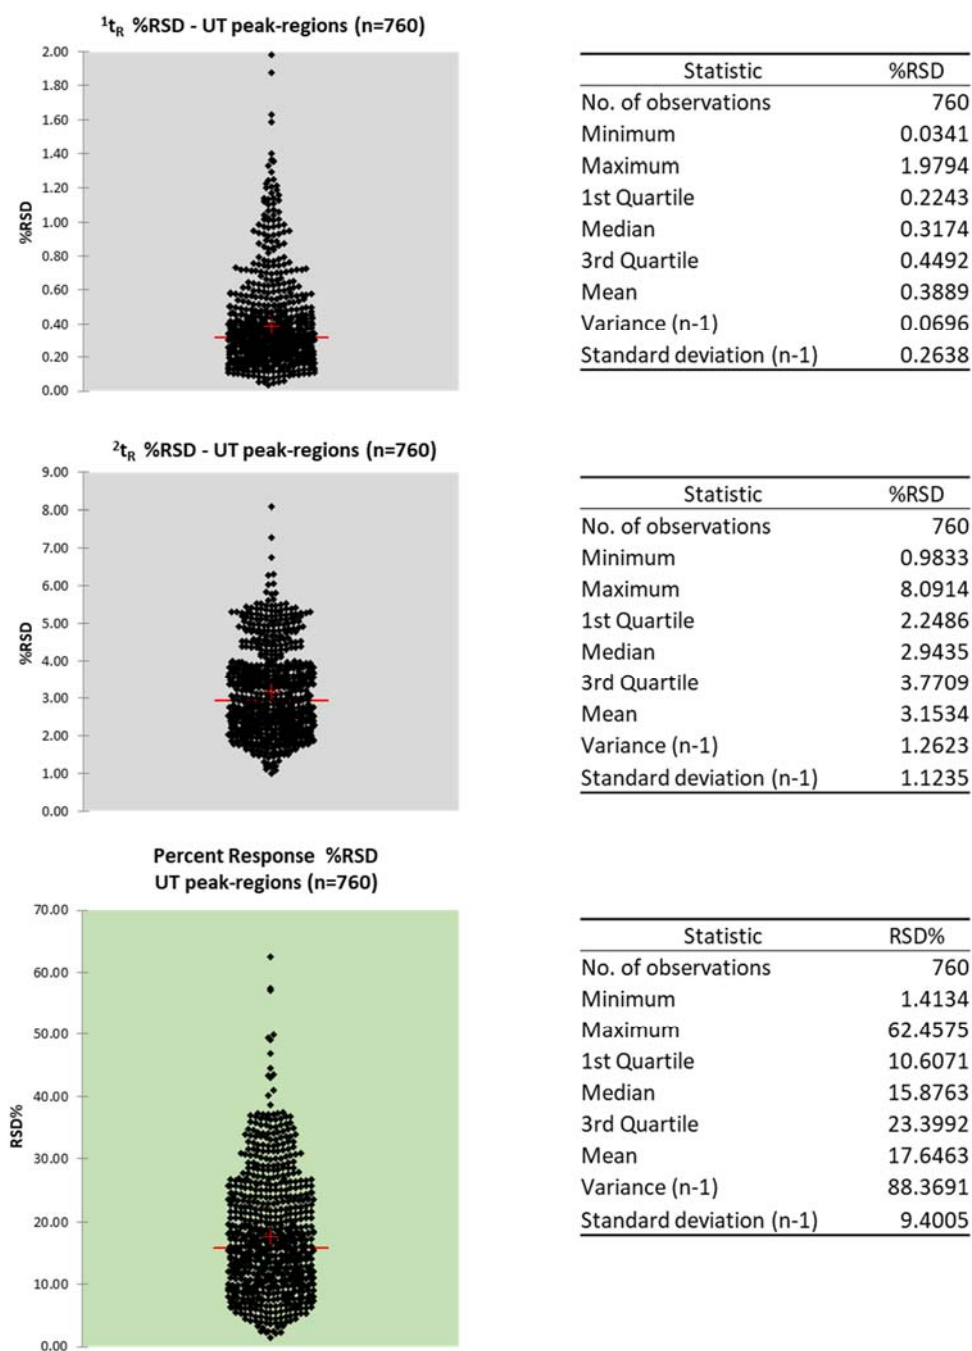

**Figure S4.** method repeatability is indicated in terms of % relative standard deviation (%RSD) for both chromatographic dimensions ( $1t_R$  and  $2t_R$ ) and for % response, collected from UT peak-regions.

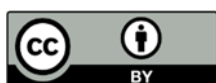

Supplement: molecules-25-02447-s001.pdf [file molecules-25-02447-s001.pdf]
